# Supplementary material
Source: publisher site journal article supplement (https://www.kjim.org/upload/media/kjim-2025-194-Supplementary-Fig-3.pdf)
Supplement: Supplementary file 1 [file kjim-2025-194-Supplementary-Fig-3.pdf]

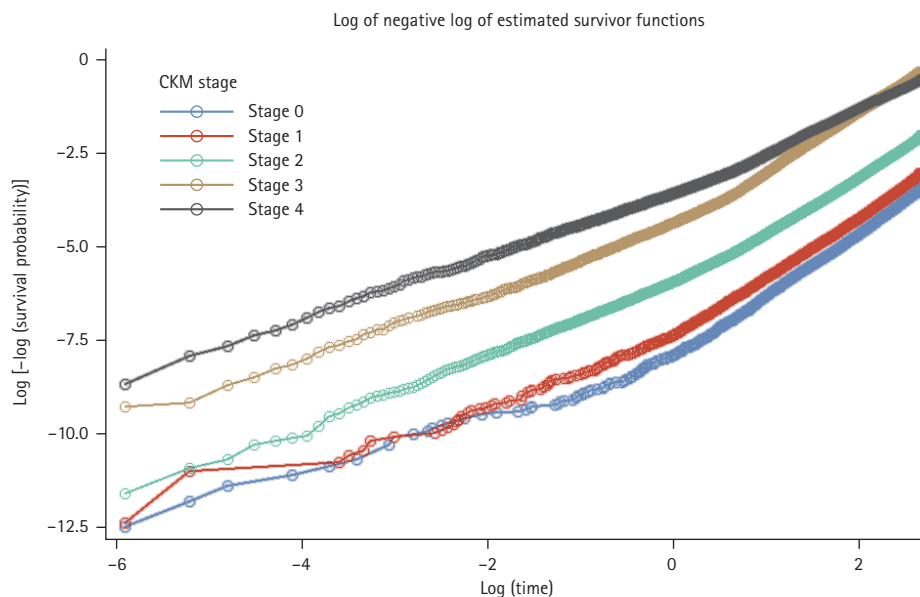

**Supplementary Figure 3.** Log-minus-Log survival plots by CKM stage. Log-minus-log survival plots were used to assess the proportional hazards assumption across CKM stages. The survival curves appear roughly parallel for most of the follow-up period, supporting the proportional hazards assumption. Some minor convergence of lines between stages 3 and 4 was observed toward the end of the follow-up, but the overall patterns remained consistent with proportionality. CKM, cardiovascular-kidney-metabolic.
